## **Effects of speculum lubrication on cervical smears for cervical cancer screening: a double blind randomized clinical trial**

### **Authors:**

Chito P. Ilika<sup>1</sup>; George U. Eleje<sup>1,2</sup>; Michael E. Chiemeka<sup>3</sup>; Frances N. Ilika<sup>4</sup>; Joseph I. Ikechebelu<sup>1,2</sup>; Valentine C. Ilika<sup>5</sup>; Emmanuel O. Ugwu<sup>6</sup>; Ifeanyiichukwu, J. Ofor<sup>7</sup>; Onyecherelam M. Ogelle<sup>1,2</sup>; Osita S. Umeononihu<sup>1,2</sup>; Johnbosco E. Mamah<sup>8</sup>; Chinedu L. Olisa<sup>1,9</sup>; Chijioke O. Ezeigwe<sup>1,2</sup>; Malarchy E. Nwankwo<sup>1,2</sup>; Chukwuemeka J. Ofojebe<sup>1,2</sup>; Chidinma C. Okafor<sup>10</sup>; Onyeka C. Ekwebene<sup>11</sup>; Obinna K. Nnabuchi<sup>1</sup>; Chigozie G. Okafor<sup>1</sup>

### **Affiliations**

<sup>1</sup>Department of Obstetrics and Gynaecology, Nnamdi Azikiwe University Teaching Hospital, Nnewi, Anambra State, Nigeria.

<sup>2</sup>Department of Obstetrics and Gynaecology, Nnamdi Azikiwe University, Awka, Anambra State, Nigeria.

<sup>3</sup>Department of Anatomic Pathology and Forensic Medicine, Nnamdi Azikiwe University Teaching Hospital, Nnewi, Anambra State, Nigeria.

<sup>4</sup>Health Policy Plus (HP+), Abuja, Nigeria.

<sup>5</sup>Department of Internal medicine, Nnamdi Azikiwe University Teaching Hospital, Nnewi, Anambra State, Nigeria.

<sup>6</sup>Department of Obstetrics and Gynaecology, College of Medicine, University of Nigeria Teaching Hospital, Enugu Campus, Enugu State, Nigeria.

<sup>7</sup>Department of Obstetrics and Gynaecology, College of Medicine, Enugu State University Teaching, Parklane, Enugu State, Nigeria.

<sup>8</sup>Alex-Ekwueme Federal University Teaching Hospital, Abakaliki, Nigeria

<sup>9</sup>Department of Pharmacology and Therapeutics, Nnamdi Azikiwe University, Awka, Anambra State, Nigeria

<sup>10</sup>Department of Psychiatry, Leicestershire Partnership NHS Trust, Leicester, United Kingdom.

<sup>11</sup>Department of Biostatistics and Epidemiology, East Tennessee State University, USA.

**Correspondence:**

**DR CHIGOZIE GEOFFREY OKAFOR**

Consultant Obstetrician and Gynaecologist

Department of Obstetrics and Gynaecology

Nnamdi Azikiwe University Teaching Hospital (NAUTH)

Nnewi,

Anambra State,

Nigeria.

Orcid no: 0000-0003-4458-8216

Phone no. +2348034802657

Email: [chigolz@yahoo.com](mailto:chigolz@yahoo.com)

The Trial was registered with **Pan-African Clinical Trial Registry** with unique identification/registration no: **PACTR2020077533364675**.

## ABSTACT

**Background:** Speculum lubrication may help to reduce the pain experienced during Pap-smears collection and hence increase uptake of cervical cancer screening and repeat testing but there are fears of its interference with cytological results.

**Aim:** To determine and compare adequacy of cervical cytology smears and mean pain scores of women undergoing cervical cancer screening with or without speculum lubrication.

**Methods:** This was a randomized controlled study of 132 women having cervical cancer screening at a tertiary hospital in Nigeria. Sixty-six participants each were randomly assigned to the ‘Gel’ and ‘No Gel’ groups respectively. Pap-smears were collected from each participant with lubricated speculum (‘Gel group’) or non-lubricated speculum (‘No Gel group’). The primary outcome measures were; the proportion of women with unsatisfactory cervical cytology smears and the mean numeric rating scale pain scores while the secondary outcome measures were the proportion of women that are willing to come for repeat testing and the cytological diagnosis of Pap-smear results.

**Results:** The baseline socio-demographic variables were similar in both groups. There was no significant difference in the proportion of unsatisfactory cervical smear results between the two groups (13.6% vs. 21.2%  $p = 0.359$ ). However, the mean pain scores were significantly lower in the gel group than in the no gel group (45.04 vs 87.96;  $p < 0.001$ ). An equal proportion of the participants in each group (90.9% vs. 90.9%;  $p > 0.999$ ) were willing to come for repeat cervical smears in the future.

**Conclusion:** Speculum lubrication did not affect the adequacy of cervical-smears but significantly reduced the pain experienced during Pap-smear collection. Also, it did not significantly affect willingness to come for repeat cervical smears in the future.

The Trial was registered with **Pan-African Clinical Trial Registry** with unique identification/registration no: **PACTR2020077533364675**.

**Keywords:** Pap-smears, Speculum lubrication, Pain, Cervical cancer, Screening.

## 1 **Introduction**

2 Cancer of the cervix is the fourth most prevalent malignancies in females with a projected incidence of  
3 570,000 in 2018.<sup>1</sup> It represents 6.6 per cent of all gynaecological carcinomas and is responsible for 7.5 per  
4 cent of all female malignancy mortality worldwide.<sup>1</sup> Out of the 311 000 cases of mortality estimated from  
5 carcinoma of the cervix yearly, greater than 85% of these deaths happen in areas that are less developed<sup>1</sup>.

6 Introducing screening for cancer of the cervix and improving its uptake especially in developing countries  
7 is key to decreasing the death burdens from malignancy of the cervix. In addition, the usage of screening  
8 programs can be improved via increasing sensitization on the risk factors of carcinoma of the cervix which  
9 include early coitarche, multiple sexual partners, HPV infections, extensive use of oral contraceptives and  
10 HIV infections<sup>2</sup>.

11 The conventional Papanicolaou test remains the commonest screening method for cancer of the cervix<sup>3</sup>. In  
12 high income countries, there are well structured programs which enable vaccination of girls against HPV  
13 and regular screening of women resulting in remarkable decrease in the development and complications of  
14 carcinoma of the cervix<sup>4,5,6</sup>. Screening helps to achieve early identification and intervention which prevents  
15 up to 80% of cervical malignancies in high income countries,<sup>4,5,6</sup> whereas in poor income countries, there  
16 is poor access to vaccination and testing resulting in diagnosis of cervical cancer mainly in advanced  
17 stages<sup>7,8</sup>. In addition, these countries lack access to facilities required for the management of such advanced  
18 stage diseases giving rise to a greater death rate from malignancy of the cervix in poor countries<sup>7,8</sup>.

19 In as much as efforts are being made to improve vaccinations for HPV in order to prevent carcinoma of the  
20 cervix, early identification of premalignant lesions of the cervix through cervical Papanicolaou smear  
21 cytology screening remains a key factor for achieving a decline in the development and complications of  
22 carcinoma of the cervix in low and middle income countries where vaccination for Human Papilloma Virus  
23 services is limited<sup>9</sup>.

24 The Papanicolaou test is a well-recognized, efficient and reliable tool employed in early identification of  
25 premalignant lesions of the cervix resulting in substantial decrease in disease burden of carcinoma of the  
26 cervix<sup>10</sup>. It is cost-effective and the technique is simple. Despite this, the uptake of Papanicolaou smear in  
27 our environment remains poor. Pain and discomfort associated with examination of the vagina can  
28 discourage women from assessing regular test, other factors that may hinder compliance include lack of  
29 awareness, cost implication, anxiety and cultural beliefs<sup>7,11</sup>.

30 Insertion of speculum for examination of vagina is an important factor responsible for non- compliance to  
31 regular screening and repeat testing for carcinoma of the cervix because of the embarrassment, anxiety,

32 pain and discomfort associated with it<sup>12</sup>. In Australia, a research seeking to find out the attitude of women  
33 concerning self-insertion compared to physician insertion of the speculum showed that 91% of the study  
34 population will prefer to insert the speculum by themselves rather than a physician doing it because of the  
35 embarrassment and discomfort associated with it<sup>13</sup>.

36 During intercourse, lubrication is physiologically essential for easy penetration of the vagina and absence  
37 of optimal lubrication results in dyspareunia. So we cannot justify inserting without lubrication a rigid  
38 instrument like a speculum into the vagina. Speculum lubrication should be employed to minimize  
39 discomfort and pain during vaginal examinations thereby ultimately increasing compliance for screening.  
40 However, applying lubricating gel on the vagina is not encouraged by gynaecologic literature, also students  
41 and resident doctors in training are advised against lubricating the speculum while collecting sample due  
42 to the worry that it may interfere with cytology results of cervical smears often leading to inadequacy.<sup>10,14</sup>  
43 However, there is paucity of convincing evidence to prove that using lubricating gel can prevent proper  
44 cytological analysis<sup>15,16,17</sup>.

45 The aim of this study was to determine the effects of speculum lubrication on the adequacy of cervical  
46 cytology smears and to determine if it decreases pain/discomfort in women undergoing cervical cancer  
47 screening by means of cervical smears and also compare the proportion of women willing to come for  
48 repeat cervical smears in the future.

49

50

51

52

53

54

55

56

57

## 58 **Materials and Methods**

59 This work was a prospective randomized controlled trial of 132 women having cervical cancer screening  
60 at the gynaecologic clinic of Nnamdi Azikiwe University Teaching Hospital (NAUTH) Nnewi, Anambra  
61 State, Nigeria from 21<sup>st</sup> Augusts, 2020 to 31<sup>st</sup> December, 2020. Ethical approval was obtained from NAUTH  
62 Ethics review committee with the approval reference number: NAUTH /CS/66/VOL.12/098/2019/040.

63 The participants included pre-menopausal women of atleast 25years and post-menopausal women who  
64 required pap smear screening. Women excluded were virgins, recent sexual intercourse, pregnant women,  
65 women having their menstrual period, women with any overt cervical pathology and/or current treatment  
66 of any vaginal condition, women with vulvar pathologies or those on hormone replacement therapy.  
67 Women with vaginitis, those undergoing vulvectomy or vaginectomy and women who had fertility-sparing  
68 surgery were also excluded.

69 The sample size was calculated using the formula for sample size determination of minimum sample size  
70 for experimental studies (Difference in proportions). Substituting for the values of proportion of  
71 unsatisfactory smears as found in a previous study <sup>11</sup>

$$72 \quad n = \frac{[(Z_{\beta} + Z_{\alpha/2})^2 \times 2P(1-P)]}{E^2}$$

73

74 Where  $P = (P_1 + P_2) / 2 = (0.01 + 0.005) / 2 = 0.0075$ ,  $E = \text{Effect size} = P_1 - P_2 = 0.01 - 0.005 = 0.005$ ,  $Z_{\beta} =$   
75 Corresponding Z value at 80% Power = 0.84.  $Z_{\alpha/2} = 1.96$  (Corresponding Z value at 95% confidence level)

76 Adjusting for finite population,  $N = 60$  samples from clinic in 3 months.

77  $n_s = n^1 / 1 + n^1/N$ , where;  $n_s = \text{Adjusted sample size}$ ,  $n^1 = \text{Calculated sample size}$ ,  $N = \text{population for study}$ .  
78 Considering attrition rate of 10.0%, the total number of subjects was 132 (66 in each arm).

79 The procedure was explained and participants counselled on the procedure, pre-procedure precautions like  
80 abstinence from sexual intercourse for atleast 24 hours prior to the procedure and avoidance of douching  
81 were observed. Trained research assistants (Senior Registrars) and the researchers were involved in  
82 counselling of participants and collection of the pap smears. Following a written informed consent, selected  
83 women were randomly assigned to the gel group or no gel group. The sequence of randomization was  
84 generated by the computer via randomly permuted blocks (blocks of 4, allocation ratio 1:1). To keep a  
85 similar number of subjects in each group, a block randomization method with blocks of 4 was used. An  
86 independent person who was not involved in the study performed the randomization using computer  
87 software program available at <http://mahmoodsaghaei.tripod.com/Softwares/randalloc.html>. Allocation  
88 concealment was done using serially numbered opaque sealed envelopes which contained either a sheet of  
89 paper showing gel group (Group A) placing the participant into the group using the speculum lubrication

90 or a paper displaying no gel group (group B) placing the participant into the group receiving dry speculum  
91 (without speculum lubrication). The envelopes were kept and opened by an independent person. Once the  
92 envelope was opened the allocation of the participant was not changed. The histopathologist and  
93 participants were blinded and so were not aware of the intervention arm hence double blind.

94 The study procedure required the participants to be placed in dorsal position with the legs flexed at the knee  
95 and adducted at the hips. Following identification of appropriate size speculum, 2mls of KY jelly (Dionel,  
96 Maryland -USA) was applied on the entire external surfaces of the metal Cusco's speculum and inserted  
97 gently into the vagina to visualize the cervix. A non- lubricated speculum was used for the control group.  
98 A dry gauze swab was used to clear any mucous on the cervix. A cytobrush (Liqui-PREP™ LGM  
99 International, Inc. Melbourne USA) was used to take the sample for Pap smear. Having obtained the sample,  
100 the head of the brush was removed and put into the liquid preparative collection vial containing a liquid  
101 based medium. (Liqui-PREP™ LGM International, Inc. Melbourne USA) The specimen in the vial was  
102 then carefully mixed in the liquid based medium. Then, the speculum was gently withdrawn. The patient  
103 was cleaned and counselled on the outcome. After each smear the patient was asked to rate her pain at the  
104 end of the procedure using a Numeric Rating Scale for pain from 0 (no discomfort) to 10 (most discomfort)  
105 indicate if she was willing to come for repeat testing in the future. Numeric Rating Scale for pain was used  
106 because it is authenticity and its universal acceptance for evaluation of pain.<sup>11</sup>

107 At histopathology laboratory of NAUTH, the vial was transferred into a centrifuge tube with same quantity  
108 of cleaning solution. The fluid was then centrifuged for 10 minutes at 1400 rpm; the supernatant was  
109 removed. Smears were made from the sediments after mixing with the cellular base solution (Liqui-PREP™  
110 LGM International, Inc. Melbourne USA), stained by the Papanicolaou staining method and reported using  
111 the Bethesda system stating whether the sample was satisfactory or not and the reason for unsatisfactory  
112 results. Samples were recorded as “unsatisfactory” if 75% of the cells were obscured by blood or  
113 inflammation, or if drying artifact or gel overlay were present. Otherwise, they were recorded as  
114 “satisfactory”.<sup>10,18</sup>. The patients with unsatisfactory smear results and positive cytological result were  
115 referred to the managing gynaecological unit for management and follow up while those with negative  
116 cytological result were counselled for repeat testing.

117 The primary outcome measures were; The proportion of women with unsatisfactory cervical cytology  
118 smears and the mean numeric rating scale pain scores. While the secondary outcome measures were; The  
119 proportion of women that are willing to come for repeat testing and the cytological diagnosis of Pap smear  
120 results.

121 Statistical Packages for Social Sciences (SPSS) IBM Corp version 25.0 was employed in the analysis of  
122 results. Tables were used to represent collected data. Means and standard deviations were used to represent  
123 continuous data. Mann- Whitney U Test was used to assess non-parametrics variables and chi squared test  
124 was used for categorical variables. Statistical significance was deduced at p-value less than 0.05.

125

126

127

128

129

130

131

132

133

134

135

136

137

138

139

140

141

142

143



## 144 **Results**

145 149 women were assessed for eligibility, however, 132 participants met the inclusion criteria and were  
146 randomized into the Gel group (n=66) and No gel group (n=66). A flow diagram describing the participants  
147 flow through the study is shown in Figure 1. Table 1 shows the socio-demographic characteristics of  
148 participants in both groups. In terms of educational qualification, 89 (67.4%) of the participants had tertiary  
149 education while 28% and 4.5% attained secondary and primary education respectively. There was no  
150 significant difference in the baseline sociodemographic data of the two groups.

151 There was no significant difference in the proportion of unsatisfactory cytology smear (13.6% vs 21.2%;  
152  $p=0.359$ ) and normal Pap smear results (100.0% vs 98.1%;  $p=0.477$ ) in the gel group and no gel group,  
153 respectively. This is shown in Table 2.

154 The reasons for the unsatisfactory smear results were due to obscurity by marked inflammation (11.1% vs  
155 14.3%;  $p=0.691$ ) and presence of scanty cells (88.9% vs 85.7%;  $p=0.691$ ) in the Gel and No Gel group  
156 respectively. Drying artifact due to gel was not reported by the histopathologist. This is shown in Table 3.

157 The mean pain scores were statistically lower in the Gel group than in the No gel group (45.04 vs 87.96;  
158  $p<0.001$ ). While 3 people from the no gel group had scores of 9 and 10, the pain scores in the gel group  
159 were less than 9. Additionally, 69.7%, 22.7%, and 7.6% of the women in the gel group had mild, moderate  
160 and severe pain respectively, while 3.0%, 68.2%, and 18.2% in the no gel group had mild moderate and  
161 severe pain respectively ( $p<0.001$ ). This is shown in Table 4 and 5.

162 The association between category of pain and parity among the participants is shown in Table 6. The pain  
163 scores appear to be more at the extremes of parity.

164 Majority of the participants in both groups (90.9% vs 90.9%;  $p>0.999$ ) were willing to come for repeat  
165 cervical smears in the future after undergoing initial cervical cancer screening. Although more participants  
166 in Gel group (98.5% vs 92.4%;  $p=0.208$ ) were more satisfied with smear collection procedure than in the  
167 no Gel group, however, the difference was not statistically significant. This is shown in table 7.

168 Some participants were unwilling to repeat Pap smear test because the procedure was discomforting (33.3%  
169 vs 16.7%;  $p=0.691$ ), painful (66.7% vs 66.7%;  $p=0.691$ ) and very uncomfortable (0.0% vs 16.7%;  $p=0.691$ )  
170 in the Gel and No Gel group respectively. This is shown in table 8.

171

172

## 173 Discussion

174 The practice of speculum lubrication for vaginal examination is varied due to the fears that lubricants can  
175 alter the adequacy of cytological smears. However, recent studies documenting the relationship between  
176 speculum lubrication and Pap smear accuracy have showed evidence supporting that speculum lubrication  
177 does not disrupt the evaluation of cytological smears.

178 Our findings revealed that there was no significant difference in the proportion of unsatisfactory cytology  
179 smear results in the gel group and no gel group (13.6% vs 21.2%;  $p=0.359$ ) respectively. This was similar  
180 to the findings in previous studies.<sup>10,11,18,19</sup> However; this was in contradiction to the findings of  
181 Charoenkwan et al and Kosus et al which showed statistically significant greater numbers of unsatisfactory  
182 smears in the participants that received speculum lubrication<sup>20,21</sup>. The reason for the differing report by  
183 Charoenkwan et al may be because; there was direct contamination of the smears with gel in their study as  
184 against speculum lubrication employed in our present study. Similarly, in Kosus et al, the risk of  
185 significantly higher inadequate results in the gel group could be because of the personnel that collected the  
186 smears as majority were inexperienced trainees.<sup>21</sup> The experience of the provider has been implicated as  
187 one of the risk factors for smear inadequacy.<sup>11,18,19</sup> Also there are some reports in the literature that suggest  
188 that lubricants can affect the result of cervical cytology<sup>22,23</sup> In most of these studies, lubricant gel was added  
189 intentionally to Liquid based cytology specimens. Most of these study designs do not reflect actual clinical  
190 practice.

191 The Bethesda system requires that Papanicolaou preparations must include enough cells to cover 10% of a  
192 slide.<sup>18</sup> If 75% of the epithelial cells are obscured by blood, inflammation, or artifact, the slide is considered  
193 unsatisfactory.<sup>18,19</sup> The reasons for the unsatisfactory smears in this study were scanty cells (87%) and  
194 obscurity by inflammation (13%). This finding was similar between the two groups. Gel overlay or  
195 obscurity by gel was not recorded as a reason for unsatisfactory results. This is similar to the findings by  
196 Amies et al and Gilson et al where the reason for unsatisfactory result was obscurity by blood, inflammation  
197 and gel overlay was not documented as a reason for unsatisfaction<sup>10,18</sup>.

198 This study has revealed that higher pain scores were recorded in the no gel group compared to the gel group  
199 ( $p<0.001$ ). This finding agrees with previous studies by Uygur et al and Gungorduk et al where the pain  
200 scores were significantly higher in the arm that did not use speculum lubrication<sup>11,24</sup>. However, our findings  
201 differ from the work of Gilson et al that reported that speculum lubrication did not affect pain and  
202 discomfort<sup>10</sup>. The difference between the present study and that of Gilson et al may be because of the method  
203 of assessment of the pain used. In the study by Gilson et al, pain was assessed using Wong-Baker Faces

204 Pain Rating Scale which is less effective method of pain measurement. while in this study Numeric rating  
205 scale for pain which has been shown to be widely appropriate for pain evaluation globally was utilized.

206 All the samples came out negative for intraepithelial lesion or malignancy except one that was low grade  
207 squamous intraepithelial lesion. There was no diagnosis of invasive cancer or high grade squamous  
208 intraepithelial lesion. This absence or insignificant number of positive cytological reports of epithelial  
209 lesions has also been reported by other studies.<sup>19,22</sup> This might be explained by the fact that study population  
210 was more of the asymptomatic younger age group, healthy volunteers and not the age group with higher  
211 risk of positive cytological reports of epithelial lesions.

212 When the pain scores assessed were compared according to parity of the participants, it was observed that  
213 the severity of the pains was seen at the extremes of parity. The reason for this peculiar finding may be  
214 because at nulliparous state the vagina and introitus may be narrower than in the parous state. However, the  
215 pain may also be more severe at higher parity because women with higher parity may have completed  
216 family size and are older or may be postmenopausal resulting in the vaginal atrophy and vaginitis. These  
217 conditions expectedly will elicit more pain reaction among the participants.

218 This study had revealed that more participants in Gel group (98.5% vs 92.4%;  $p=0.208$ ) were more satisfied  
219 in the Pap smear collection procedure than in the no Gel group, but the difference was not statistically  
220 significant. In addition, equal proportion of the participants in each group (90.9% vs 90.9%;  $p>0.999$ ) were  
221 willing to come for repeat cervical smears in the future after undergoing initial cervical cancer screening.  
222 This finding is not only interesting but encouraging. This could be explained by the fact that more than half  
223 (67.4%) of the study population had tertiary education, and 28% had secondary education resulting in a  
224 high level of awareness, knowledge and need for the uptake of the cervical screening among the study  
225 population. In a previous review by Chorley et al, it was revealed that a single negative experience  
226 prevented some women from re-attending screening, even if they had multiple positive previous  
227 experiences to draw upon. However, the studies involved in the Chorley et al systematic review were not  
228 randomized controlled trials and did not compare the failure at re-screening in women that received  
229 speculum lubrication versus no speculum lubrication.<sup>25</sup>

230 It was also noted that the reasons why some participants were unwilling to come for repeat testing in the  
231 future was due to pain (66.7%) and discomfort (25%). Although these findings do not differ among the two  
232 groups, it still helps to buttress the fact that pain while undergoing Pap smear collection is a strong reason  
233 why some women would not present for repeating testing.

234 The strength of the study was that it is a double blind randomized controlled study. The study also employed  
235 liquid based cytology thereby forming a literature base for future comparison as most of the studies in the  
236 literature employed the conventional Pap smear technique. However, the limitation was that only one type  
237 of water-based lubricant (KY-Jelly) was used, so results may not be applied to other kinds of lubricants.  
238 Also, our study only utilized metal speculums so the findings may also not be applied to plastic type of  
239 speculum. Perception of pain is complex and multifactorial, and so cultural, genetic and environmental  
240 factors may affect these results in different populations. The study was a single center based hence multi-  
241 center similar randomized studies are needed.

## 242 **Conclusion**

243 In conclusion, speculum lubrication did not affect the adequacy of the cervical cytology smears, satisfaction  
244 for Pap smear procedure and the willingness to come for repeat cervical smears in the future after initial  
245 cervical cancer screening but significantly reduced the pain and discomfort experienced at Pap smear  
246 collection.

## 247 **Disclosure statement for publication**

248 This work or its part has not been submitted to another journal for publications. All the authors contributed  
249 to conceptualization, or design, or drafting of manuscripts, or collection of data/data analysis and final  
250 drafting and revision of manuscript for submission.

## 251 **Funding**

252 The researchers funded the research and none of the participants paid for the procedure or investigation

## 253 **Ethical considerations**

254 The study adhered to CONSORT guidelines<sup>26</sup>. The approval for the study was obtained from the Ethics  
255 committee of Nnamdi Azikiwe University Teaching Hospital Nnewi (NAUTH), Nnewi, Nigeria on 24<sup>th</sup>  
256 September 2019 with the approval reference number: NAUTH /CS/66/VOL.12/098/2019/040. The study  
257 was carried out in accordance with the ethical principles of clinical research involving human participants  
258 according to Helsinki declarations

## 259 **Consent to participate**

260 All the recruited participants gave an informed written consent to participate in the study.

261

262 **Author contribution**

263 Chito P. Ilika, the principal author, was involved in the conceptualization/design of the study, manuscript  
264 writing, revision, data collection. George U. Eleje; Michael E. Chiemeka, and Joseph I. Ikechebelu were  
265 involved in manuscript writing, revision and supervision. Chigozie G. Okafor; Emmanuel O. Ugwu,  
266 Ifeanyichukwu, J. Ofor, Onyecherelam M. Ogelle, Osita S. Umeononihu, Johnbosco E. Mamah, Chinedu  
267 L. Olisa, Chijioke O. Ezeigwe, Malarchy E. Nwankwo and Chukwuemeka J. Ofojebe participated in  
268 manuscript writing and revision. Frances N. Ilika; Valentine C. Ilika; Chidinma C. Okafor, Onyeka C.  
269 Ekwebene and Obinna K. Nnabuchi participated in manuscript writing, revision and Data analysis.

270 **Trial Registration**

271 The Trial was registered with Pan-African-Clinical-Trial-Registry on 08/07/2020 with unique  
272 identification/registration-no: PACTR2020077533364675.

273 **Acknowledgment**

274 The authors sincerely appreciate everyone that contributed to the success of this study especially the patients  
275 that were recruited into the study and the NAUTH, Nnewi, Nigeria.

276 **Conflict of interest**

277 There was no conflict of interests.

278

279

280

281

282

283

284

285

286

287 **References.**

- 288 1) Ferlay J, Colombet M, Soerjomataram I, Mathers C, Parkin DM. Estimating the global cancer  
289 incidence and mortality in 2018: GLOBOCAN sources and methods. *Int J cancer*. 2019 Apr 15; 144  
290 (8):1941-1953.
- 291 2) Eleje GU, Eke AC, Igberase GO, Igwegbe AO, Eleje LI. Palliative interventions for controlling vaginal  
292 bleeding in advanced cervical cancer. *Cochrane Database Syst Rev*. 2019 Mar 19; 3: CD011000.
- 293 3) Mittal S, Kamath AJ. Cytological screening for cervical cancer in women of reproductive age group.  
294 *Int J Reprod Contracept Obstet Gynecol* 2017; 6:5464-8.
- 295 4) White MC, Wong FL. Preventing premature deaths from breast and cervical cancers among  
296 underserved women in the United States: insights gained from a national cancer screening  
297 program. *Cancer Causes Control*, 2015; 26(5):805–9.
- 298 5) Miller JW, Royalty J, Henley J, White A, Richardson LC. Breast and cervical cancers diagnosed and  
299 stage at diagnosis among women served through the National Breast and Cervical Cancer Early  
300 Detection Program. *Cancer Causes Control*, 2015; 26(5):741–7.
- 301 6) Ekwueme DU, Uzunangelov VJ, Hoerger TJ, Miller JW, Saraiya M, Benard VB. Impact of the National  
302 Breast and Cervical Cancer Early Detection Program on cervical cancer mortality among uninsured  
303 low-income women in the U.S., 1991–2007. *Am J Prev Med*. 2014; 47 (3):300–8.
- 304 7) Eleje GU, Eke AC, Igberase GO, Igwegbe AO, Eleje LI. Palliative interventions for controlling vaginal  
305 bleeding in advanced cervical cancer. *Cochrane Database Syst Rev*. 2019 Mar 19; 3: CD011000.  
306
- 307 8) Ikechebelu JI, Onyiaorah IV, Ugboaja JO, Anyiam DCD, Eleje GU. Clinicopathological analysis of  
308 cervical cancer seen in a tertiary health facility in Nnewi, South-east Nigeria. *J Obstet Gynaecol*. 2010;  
309 30(3):299-301.
- 310 9) Campos NG, Tsu V, Jeronimo J, Mvundura M, Kim JJ. Evidence-based policy choices for efficient and  
311 equitable cervical cancer screening programs in low-resource settings. *Cancer Med*. 2017; 6(8):2008–  
312 2014
- 313 10) Gilson M, Desai A, Cardoza-Favarato G, Vroman P, Thornton JA. Does gel affect cytology or comfort  
314 in the screening Papanicolaou smear? *J Am Board Fam Med* 2006; 19:340–4.
- 315 11) Uygur D, Guler T ,Yayci E. Association of speculum lubrication with pain and Papanicolaou test  
316 accuracy. *J Am Board Fam Med* 2012; 25:798-804.
- 317 12) Asiedu MN, Agudogo J, Krieger MS, et al. Design and preliminary analysis of a vaginal inserter for  
318 speculum-free cervical cancer screening. *PLoS One*. 2017; 12(5):e0177782. Published 2017 May 31.

- 319 **13)** Wright D, Fenwick J, Stephenson P, Monterosso L. Speculum 'self-insertion': a pilot study. *J Clin Nurs*,  
320 2005; 14(9): 1098–1111.
- 321 **14)** JK, Pathak PK, Maney R. Is liquid based Pap testing affected by water based lubricant? *Obstet Gynecol*  
322 2006; 107; 66-70.
- 323 **15)** Pergialiotis V, Vlachos DG, Rodolakis A, Thomakos N. The effect of vaginal lubrication on  
324 unsatisfactory results of cervical smears. *J Low Genit Tract Dis*. 2015 Jan; 19(1):55-61.
- 325 **16)** Allan GM, Korownyk C, Ivers N. Papanicolaou tests: does lubricant reduce the quality or  
326 adequacy? *Can Fam Physician* 2011; **57**:309.
- 327 **17)** Harmanli O, Jones KA. Using lubricant for speculum insertion. *Obstet Gynecol* 2010;116(2 Pt 1):415–  
328 7.
- 329 **18)** Amies AM, Miller L, Lee SK, Koutsky L. The effect of vaginal speculum lubrication on the rate of  
330 unsatisfactory cervical cytology diagnosis. *Obstet Gynecol* 2002; 100(5 pt 1):889Y92.
- 331 **19)** Griffith WF, Stuart GS, Gluck KL. Vaginal speculum lubrication and its effects on cervical cytology  
332 and microbiology. *Contraception* 2005; 72: 60-4.
- 333 **20)** Charoenkwan K, Ninunanahaeminda K, Khunamornpong S, Srisomboon. Effects of gel lubricant on  
334 cervical cytology. *Acta Cytol* 2008;52(6):654–658
- 335 **21)** Köşüş A, Köşüş N, Duran M, Haltas H. Effect of liquid-based gel application during speculum  
336 examination on satisfactory level of smear examination. *Arch Gynecol Obstet* 2012; 285:1599–602.
- 337 **22)** Holton T, Smith D, Terry M, Madgwick A, Levine T. The effect of lubricant contamination on  
338 ThinPrep® (Cytoc) cervical cytology liquid based preparations. *Cytopathology*. 2008;19(4):236-243.
- 339 **23)** Abdullgaffar B, Kamal MO, Khalid M, Samuel R, AlGhufli R. Lubricant, mucus, and other  
340 contaminant materials as a potential source of interpretation errors in ThinPrep cervical cytology. *J*  
341 *Low Genit Tract Dis* 2010;14(1):22-8.
- 342 **24)** Gungorduk K, Ozdemir A, Gokcu M, Sancı M. Does lubrication of the vaginal speculum reduce pain  
343 during a gynaecological oncologic examination? *Eur J Obstet Gynecol Reprod Biol* 2015; 184:84-8.
- 344 **25)** Chorley AJ, Marlow LAV, Forster AS, Haddrell JB, Waller J. Experiences of cervical screening and  
345 barriers to participation in the context of an organised programme: a systematic review and thematic  
346 synthesis. *Psychooncology*. 2017; 26:161–72.
- 347 **26)** Falci SG, Marques LS. CONSORT: when and how to use it. *Dental Press J Orthod*. 2015 May-Jun;  
348 20(3):13-5.doi:10.1590/2176-9451.20.3,013-015.ebo.PMID: 26154451; PMCID: PMC4520133.

350 **List of Table legends**

- 351 1. Table 1: Socio-demographic characteristics of the participants
- 352 2. Table 2: Comparison of cytology smear adequacy and cytological diagnosis of Pap Smears results
- 353 among the study participants.
- 354 3. Table 3: Comparison of the reasons for unsatisfactory smear results as reported by the
- 355 histopathologist.
- 356 4. Table 4: Comparison of Pain scores of the participants
- 357 5. Table 5: Comparison of Pain scores of the participants using Mann-Whitney U Test
- 358 6. Table 6: Association between category of pain and parity among the participants
- 359 7. Table 7: Satisfaction for Pap smear procedure and willingness for repeat of Pap smear among the
- 360 study participants.
- 361 8. Table 8: Participants' Reasons for unwillingness to repeat Pap smear test.

362

363

364 **Figure Legend**

- 365 i. Figure 1. Consort flowchart study participants

366

367

368

369

370

371

372

373

374

375

376



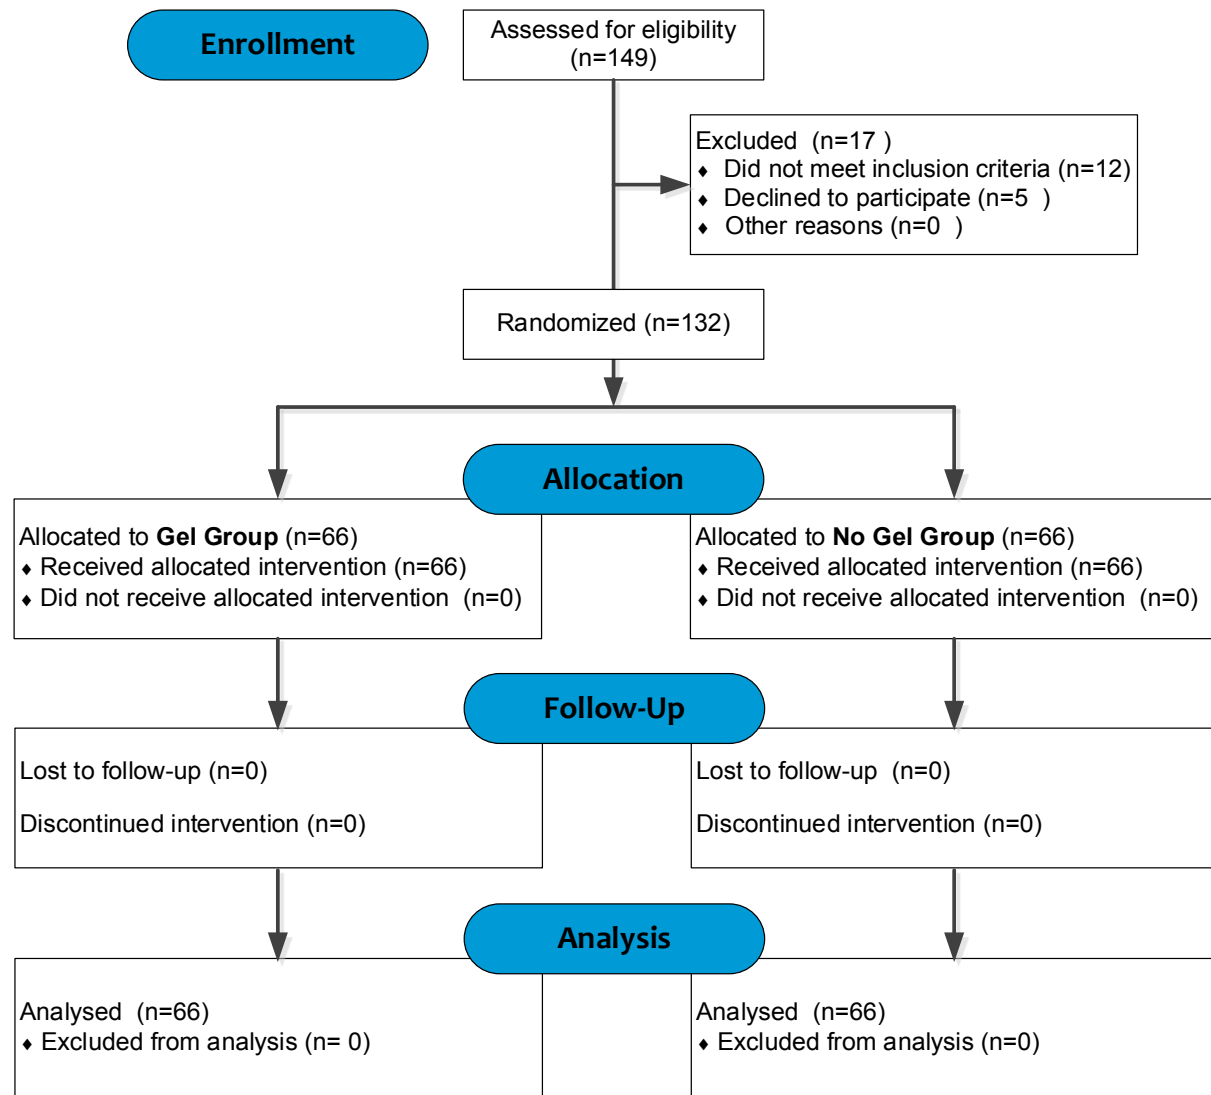

377

378 Figure 1: Consort flowchart for study participants

379

380

381

382

383

384

385 Table 1: Socio-demographic characteristics of the participants

| Variables                 |                    | Study Group |            | Total (%)  | $\chi^2$ | p-value |
|---------------------------|--------------------|-------------|------------|------------|----------|---------|
|                           |                    | GEL (%)     | No Gel (%) |            |          |         |
| <b>Age (in years)</b>     | 25-34              | 25 (37.9)   | 23 (34.8)  | 48 (36.4)  | 0.589    | 0.911   |
|                           | 35-44              | 19 (28.8)   | 23 (34.8)  | 42 (31.8)  |          |         |
|                           | 45-54              | 17 (25.8)   | 15 (22.7)  | 32 (24.2)  |          |         |
|                           | 55 and above       | 5 (7.6)     | 5 (7.6)    | 10 (7.6)   |          |         |
| <b>Marital status</b>     | Single             | 16 (24.2)   | 16 (24.2)  | 32 (24.2)  | 2.094    | 0.568†  |
|                           | Married            | 43 (65.2)   | 47 (71.2)  | 90 (68.2)  |          |         |
|                           | Separated/Divorced | 1 (1.5)     | 0 (0.0)    | 1 (0.8)    |          |         |
|                           | Widowed            | 6 (9.1)     | 3 (4.5)    | 9 (6.8)    |          |         |
| <b>Tribe</b>              | Igbo               | 65 (98.5)   | 65 (98.5)  | 130 (98.5) | 2.812    | >0.999† |
|                           | Ijaw               | 1 (1.5)     | 0 (0.0)    | 1 (0.8)    |          |         |
|                           | Benin              | 0 (0.0)     | 1 (1.5)    | 1 (0.8)    |          |         |
| <b>Educational status</b> | Primary            | 4 (6.1)     | 2 (3.0)    | 6 (4.5)    | 0.711    | 0.819†  |
|                           | Secondary          | 18 (27.3)   | 19 (28.8)  | 37 (28.0)  |          |         |
|                           | Tertiary           | 44 (66.7)   | 45 (68.2)  | 89 (67.4)  |          |         |
| <b>Parity</b>             | P <sub>0</sub>     | 30 (45.5)   | 31 (47.0)  | 61 (46.2)  | 7.706    | 0.258†  |
|                           | P <sub>1</sub>     | 9 (13.6)    | 5 (7.6)    | 14 (10.6)  |          |         |
|                           | P <sub>2</sub>     | 4 (6.1)     | 4 (6.1)    | 8 (6.1)    |          |         |
|                           | P <sub>3</sub>     | 2 (3.0)     | 6 (9.1)    | 8 (6.1)    |          |         |

It is made available under a [CC-BY 4.0 International license](#) .

---

|          |           |          |           |
|----------|-----------|----------|-----------|
| $P_4$    | 12 (18.2) | 7 (10.6) | 19 (14.4) |
| $P_5$    | 3 (4.5)   | 9 (13.6) | 12 (9.1)  |
| $P_{>5}$ | 6 (9.1)   | 4 (6.1)  | 10 (7.6)  |

---

386 † means Fishers Exact test applied.

387

388

389

390

391

392

393

394

395

396

397

398

399

400

401

402

403

404

405

406

407

408

409 Table 2: Comparison of cytology smear adequacy and cytological diagnosis of Pap Smears results among  
410 the study participants

| Variables                  | Study Group    |            | Total (%) | $\chi^2$   | p-value |        |
|----------------------------|----------------|------------|-----------|------------|---------|--------|
|                            | GEL (%)        | No Gel (%) |           |            |         |        |
| <b>Smear sample status</b> | Satisfactory   | 57 (86.4)  | 52 (78.8) | 109 (82.6) | 1.316   | 0.359  |
|                            | Unsatisfactory | 9 (13.6)   | 14 (21.2) | 23 (17.4)  |         |        |
| <b>PAP smear result</b>    | LSIL           | 0 (0.0)    | 1 (1.9)   | 1 (0.9)    | 1.106   | 0.477† |
|                            | NILM           | 57 (100.0) | 51 (98.1) | 108 (99.1) |         |        |

411 † Fisher's Exact test used. LSIL = Low Grade Squamous Intraepithelial Lesion; NILM= Negative for  
412 Intraepithelial lesion or malignancy

413

414

415 Table 3: Comparison of the reasons for unsatisfactory smear results as reported by the histopathologist

|                                        | Gel (%)   | No Gel (%) | Total (%)  | Test value | p-value |
|----------------------------------------|-----------|------------|------------|------------|---------|
| <b>Obscured by marked inflammation</b> | 1 (11.1)  | 2 (14.3)   | 3 (13.0)   | 4.740      | 0.691†  |
| <b>Scanty cells*</b>                   | 8 (88.9)  | 12 (85.7)  | 20 (87.0)  |            |         |
| <b>Total</b>                           | 9 (100.0) | 14 (100.0) | 23 (100.0) |            |         |

416 † Fisher's Exact test used.\* Drying artifact due to gel was not reported by the histopathologist

417

418

419 Table 4: Comparison of Pain scores of the participants

| Variables                                                           | Study Group |            | Total (%) | $\chi^2$  | p-value          |
|---------------------------------------------------------------------|-------------|------------|-----------|-----------|------------------|
|                                                                     | GEL (%)     | No Gel (%) |           |           |                  |
| <b>Numeric rating scale for pain (0 = no pain, 10 = worst pain)</b> | 1           | 23 (34.8)  | 1 (1.5)   | 24 (18.2) |                  |
|                                                                     | 2           | 13 (19.7)  | 1 (1.5)   | 14 (10.6) |                  |
|                                                                     | 3           | 10 (15.2)  | 0 (0.0)   | 10 (7.6)  |                  |
|                                                                     | 4           | 2 (3.0)    | 12 (18.2) | 14 (10.6) |                  |
|                                                                     | 5           | 6 (9.1)    | 17 (25.8) | 23 (17.4) |                  |
|                                                                     | 6           | 7 (10.6)   | 16 (24.2) | 23 (17.4) |                  |
|                                                                     | 7           | 2 (3.0)    | 11 (16.7) | 13 (9.8)  |                  |
|                                                                     | 8           | 3 (4.5)    | 5 (7.6)   | 8 (6.1)   |                  |
|                                                                     | 9           | 0 (0.0)    | 1 (1.5)   | 1 (0.8)   |                  |
|                                                                     | 10          | 0 (0.0)    | 2 (3.0)   | 2 (1.5)   |                  |
| <b>Pain Category</b>                                                | Mild        | 46 (69.7)  | 2 (3.0)   | 48 (36.4) | 63.500<br><0.001 |
|                                                                     | Moderate    | 15 (22.7)  | 45 (68.2) | 60 (45.5) |                  |
|                                                                     | Severe      | 5 (7.6)    | 19 (28.8) | 24 (18.2) |                  |

420 Mild= 1-3, moderate = 4-6, severe = 7-10

421

422

423

424 Table 5: Comparison of Pain scores of the participants using Mann-Whitney U Test

|                             | GEL (%) | No GEL (%) | Mann-Whitney U | Z- value | p-value |
|-----------------------------|---------|------------|----------------|----------|---------|
| <b>Mean Rank pain score</b> | 45.04   | 87.96      | 761.500        | -6.514   | <0.001* |
| <b>Sum of ranks</b>         | 2972.50 | 5805.50    |                |          |         |

425 There is significant higher pain in the No-Gel group compared to the Gel group (U = 761.5, p < 0.001)

426

427

428

429

430

431

432

433

434

435

436

437

438

439

440

441

442

443

444

445 Table 6: Association between category of pain and parity among the participants

| Parity               | Pain Category | Study Arms (%) |           | $\chi^2$ | p-value          |
|----------------------|---------------|----------------|-----------|----------|------------------|
|                      |               | Gel            | No Gel    |          |                  |
| <b>P<sub>0</sub></b> | Mild          | 21 (70.0)      | 2 (6.5)   | 26.216   | <b>&lt;0.001</b> |
|                      | Moderate      | 6 (20.0)       | 19 (61.3) |          |                  |
|                      | Severe        | 3 (10.0)       | 10 (32.3) |          |                  |
| <b>P<sub>1</sub></b> | Mild          | 6 (66.7)       | 0 (0.0)   | 6.031†   | 0.056            |
|                      | Moderate      | 2 (22.2)       | 4 (80.0)  |          |                  |
|                      | Severe        | 1 (11.1)       | 1 (20.0)  |          |                  |
| <b>P<sub>2</sub></b> | Mild          | 2 (50.0)       | 0 (0.0)   | 2.766†   | 0.429            |
|                      | Moderate      | 2 (50.0)       | 3 (75.0)  |          |                  |
|                      | Severe        | 0 (0.0)        | 1 ((25.0) |          |                  |
| <b>P<sub>3</sub></b> | Mild          | 1 (50.0)       | 0 (0.0)   | 2.895†   | 0.286            |
|                      | Moderate      | 1 (50.0)       | 4 (66.7)  |          |                  |
|                      | Severe        | 0 (0.0)        | 2 (33.3)  |          |                  |
| <b>P<sub>4</sub></b> | Mild          | 9 (75.0)       | 0 (0.0)   | 10.276†  | <b>0.003</b>     |
|                      | Moderate      | 2 (16.7)       | 4 (57.1)  |          |                  |
|                      | Severe        | 1 (8.3)        | 3 (42.9)  |          |                  |
| <b>P<sub>5</sub></b> | Mild          | 2 (66.7)       | 0 (0.0)   | 5.660†   | <b>0.045</b>     |
|                      | Moderate      | 1 (33.3)       | 8 (88.9)  |          |                  |

|               |          |          |          |        |              |
|---------------|----------|----------|----------|--------|--------------|
|               | Severe   | 0 (0.0)  | 1 (11.1) |        |              |
| <b>p&gt;5</b> | Mild     | 5 (83.3) | 0 (0.0)  | 6.407† | <b>0.024</b> |
|               | Moderate | 1 (16.7) | 3 (75.0) |        |              |
|               | Severe   | 0 (0.0)  | 1 (25.0) |        |              |

446 † Fisher’s Exact test used.

447

448

449

450 Table 7: Satisfaction for Pap smear procedure and willingness for repeat of Pap smear among the study  
451 participants

| Variables                                                    | Study Group |           |            | Total (%)  | $\chi^2$ | p-value |
|--------------------------------------------------------------|-------------|-----------|------------|------------|----------|---------|
|                                                              |             | GEL (%)   | No Gel (%) |            |          |         |
| <b>Satisfied with the PAP smear procedure?</b>               | YES         | 65 (98.5) | 61 (92.4)  | 126 (95.5) | 2.794    | 0.208†  |
|                                                              | NO          | 1 (1.5)   | 5 (7.6)    | 6 (4.5)    |          |         |
| <b>Total</b>                                                 |             | 66 (100)  | 66 (100)   | 132 (100)  |          |         |
| <b>Are you willing to come for repeat testing in future?</b> | YES         | 60 (90.9) | 60 (90.9)  | 120 (90.9) | 0.000    | >0.999  |
|                                                              | NO          | 6 (9.1)   | 6 (9.1)    | 12 (9.1)   |          |         |
| <b>Total</b>                                                 |             | 66 (100)  | 66 (100)   | 132 (100)  |          |         |

452 † Fisher’s Exact test used.

453

454

455

456

457

458

459



460 Table 8: Participants' Reasons for unwillingness to repeat Pap smear test

|                           | <b>Gel (%)</b> | <b>No Gel (%)</b> | <b>Total (%)</b> | <b>Test value</b> | <b>p-value</b> |
|---------------------------|----------------|-------------------|------------------|-------------------|----------------|
| <b>Discomforting</b>      | 2 (33.3)       | 1 (16.7)          | 3 (25.0)         | 1.409             | >0.999†        |
| <b>Painful</b>            | 4 (66.7)       | 4 (66.7)          | 8 (66.7)         |                   |                |
| <b>Very uncomfortable</b> | 0 (0.0)        | 1 (16.7)          | 1 (8.3)          |                   |                |
| <b>Total</b>              | 6 (100.0)      | 6 (100.0)         | 12 (100.0)       |                   |                |

461 † Fisher's Exact test used.

462

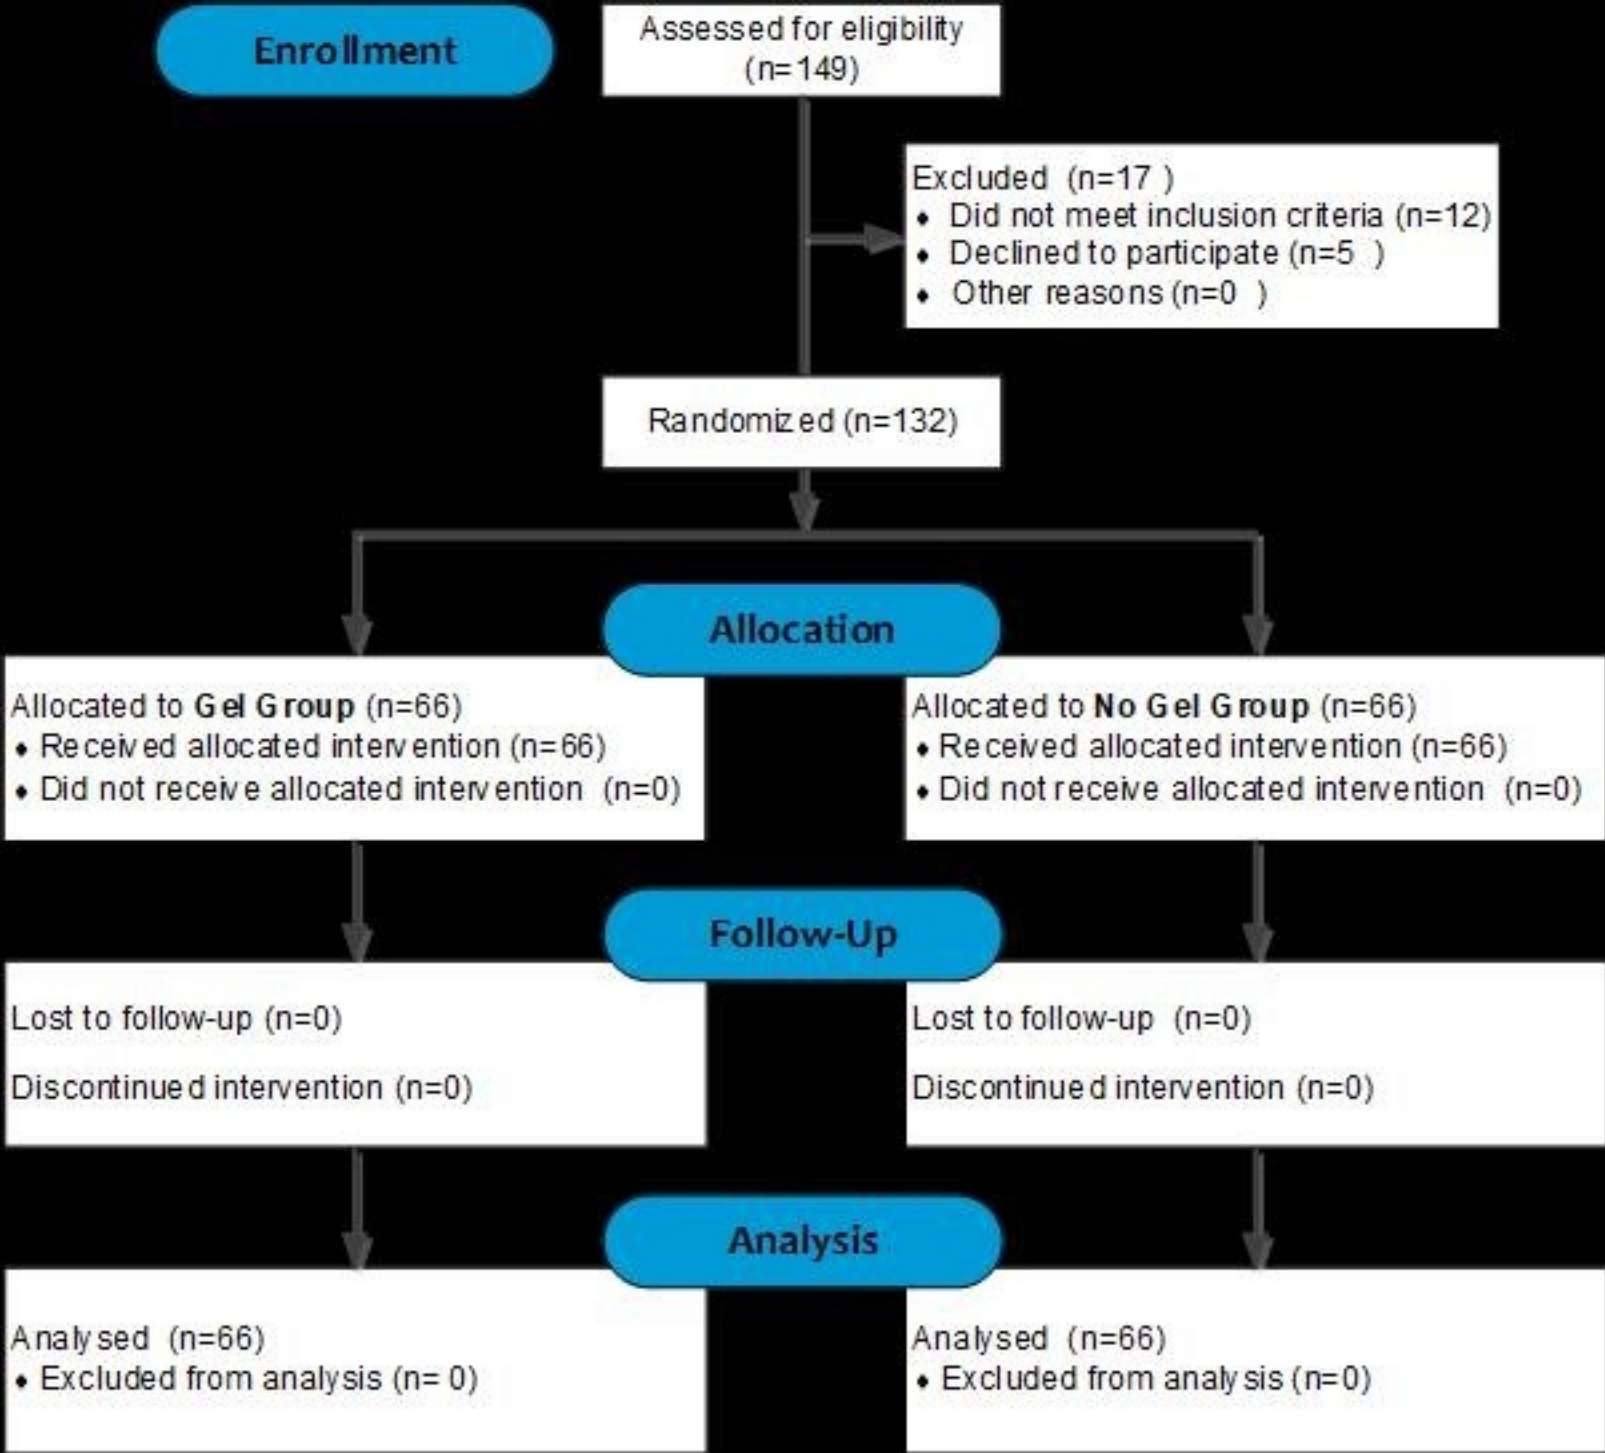

Figure
